# Supplementary material for: Programmed Death 1 and Cytotoxic T-Lymphocyte-Associated Protein 4 Gene Expression in Peripheral Blood Mononuclear Cells Can Serve as Prognostic Biomarkers for Hepatocellular Carcinoma
Source: MDPI journal article supplement (doi:10.3390/cancers16081493), 2024-04-13
Supplement: s1 [file s1]

### ***Supporting Information***

**Table S1.** The expression profiles of AST, ALT, and albumin in serum obtained from HCC patients and healthy donors.

|                   | HCC Patients   | Healthy donor | P-value |
|-------------------|----------------|---------------|---------|
| AST<br>[IU/L]     | 36.85 ± 20.273 | 21.30 ± 2.908 | < 0.001 |
| ALT<br>[IU/L]     | 24.17 ± 14.100 | 21.10 ± 7.695 | 0.509   |
| Albumin<br>[g/dL] | 3.743 ± 0.537  | 4.600 ± 0.240 | < 0.001 |
